# Supplementary material for: Significant contributions of biomass burning to PM 2.5 -bound aromatic compounds: insights from field observations and quantum chemical calculations
Source: Copernicus journal article supplement (doi:10.5194/egusphere-2024-3678), 2025-01-03
Supplement: Supplementary file 1 [file egusphere-2024-3678-supplement.pdf]

Significant contributions of biomass burning to PM<sub>2.5</sub>-bound aromatic compounds: insights from field observations and quantum chemical calculations

Yanqin Ren<sup>1</sup>, Zhenhai Wu<sup>1</sup>, Fang Bi<sup>1</sup>, Hong Li<sup>1</sup>, Haijie Zhang<sup>1\*</sup>, Junling Li<sup>1</sup>, Rui Gao<sup>1</sup>, Fangyun Long<sup>1</sup>, Zhengyang Liu<sup>1</sup>, Yuanyuan Ji<sup>1\*</sup>, Gehui Wang<sup>2\*</sup>

<sup>1</sup> State Key Laboratory of Environmental Criteria and Risk Assessment, Chinese Research Academy of Environmental Sciences, Beijing 100012, China

<sup>2</sup> Key Lab of Geographic Information Science of Ministry of Education of China, School of Geographic Sciences, East China Normal University, Shanghai 200142, China

\*Corresponding authors: Dr. Haijie Zhang /Dr. Yuanyuan Ji/ Prof. Gehui Wang

E-mail address: [Zhanghaijie@craes.org.cn](mailto:Zhanghaijie@craes.org.cn) / [ji.yuanyuan@craes.org.cn](mailto:ji.yuanyuan@craes.org.cn) / [ghwang@geo.ecnu.edu.cn](mailto:ghwang@geo.ecnu.edu.cn)

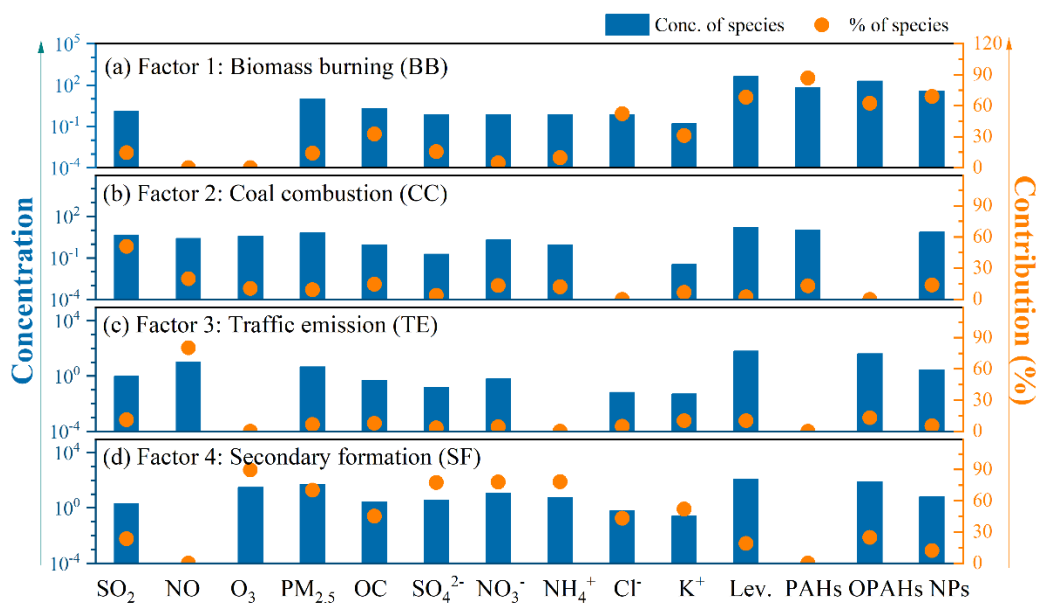

**Fig.S1** Source profiles of aromatic compounds obtained from PMF analysis (lev. – levoglucosan, and NPs – nitrated phenols).

**Table S1.** The electronic energy  $E_{\text{DFT}}$  and the Gibbs free energy  $G_{\text{DFT}}$  of reactant monomers at the M062X/6-311++G(3df,3pd) level of theory. All energies are in Hartree and  $T = 298$  K.

| Phase     | Monomers         | $E_{\text{DFT}}$ | $G_{\text{DFT}}$ |
|-----------|------------------|------------------|------------------|
| gas phase | OH               | -75.72917436     | -75.737513       |
|           | NO <sub>2</sub>  | -205.0652725     | -205.079389      |
|           | H <sub>2</sub> O | -76.42489661     | -76.42151        |
|           | Nitrobenzene     | -436.7193104     | -436.64666       |
|           | Phenol           | -307.4438958     | -307.367152      |
|           | cis-HONO         | -205.6987083     | -205.701639      |
|           | p-Cresol         | -346.7471095     | -346.645291      |
|           | IM1              | -306.7561086     | -306.693032      |
|           | IM2              | -436.0322146     | -435.973217      |
|           | IM3              | -346.065347      | -345.97788       |
|           | IM4              | -421.9825728     | -421.878094      |
|           | IM5              | -421.2955673     | -421.203709      |
|           | 4NP              | -511.9504536     | -511.874497      |
|           | 4M5NC            | -626.485922      | -626.380532      |
|           | liquid phase     | NO <sub>2</sub>  | -205.0667262     |
| Phenol    |                  | -307.4507633     | -307.374249      |
| IM1       |                  | -306.7629835     | -306.700134      |
| IM4       |                  | -421.9910599     | -421.88603       |
| IM5       |                  | -421.3038828     | -421.212406      |

**Table S2.** The electronic energy  $E_{\text{DFT}}$ , Gibbs free energy  $G_{\text{DFT}}$  and the imaginary frequency of TS calculated for the formation of 4NP by Phenol at the M06-2X/6-311++G(3df,3pd) level of theory. All energies are in Hartree and  $T = 298$  K.

| phase                    | Steps                            | Molecules                       | $E_{\text{DFT}}$ | $G_{\text{DFT}}$ | $\nu_{\text{im}}$ ( $\text{cm}^{-1}$ ) |
|--------------------------|----------------------------------|---------------------------------|------------------|------------------|----------------------------------------|
| gas phase                | H-abstraction by OH              | RC <sub>ph-OH</sub>             | -383.1814862     | -383.099624      |                                        |
|                          |                                  | TS <sub>ph-OH</sub>             | -383.1635205     | -383.085864      | -1237.1969 <i>i</i>                    |
|                          |                                  | IM1---H <sub>2</sub> O          | -383.1866979     | -383.106300      |                                        |
|                          | H-abstraction by NO <sub>2</sub> | RC <sub>ph-NO<sub>2</sub></sub> | -512.5131701     | -512.435702      |                                        |
|                          |                                  | TS <sub>ph-NO<sub>2</sub></sub> | -512.4535054     | -512.382309      | -1585.4851 <i>i</i>                    |
|                          |                                  | IM1---cis-HONO                  | -512.4624726     | -512.388355      |                                        |
| NO <sub>2</sub> addition | IM1+NO <sub>2</sub>              | -511.8213812                    | -511.772421      |                  |                                        |
|                          | 4NP                              | -511.9504536                    | -511.874497      |                  |                                        |
| liquid phase             | H-abstraction by NO <sub>2</sub> | RC <sub>ph-NO<sub>2</sub></sub> | -512.5192961     | -512.444301      |                                        |
|                          |                                  | TS <sub>ph-NO<sub>2</sub></sub> | -512.4621090     | -512.390595      | -1628.5336 <i>i</i>                    |
|                          |                                  | IM1---cis-HONO                  | -512.4713810     | -512.397119      |                                        |
|                          | NO <sub>2</sub> addition         | IM1+NO <sub>2</sub>             | -511.8297097     | -511.781083      |                                        |
|                          |                                  | 4NP                             | -511.9625041     | -511.886975      |                                        |

**Table S3.** The electronic energy  $E_{\text{DFT}}$ , Gibbs free energy  $G_{\text{DFT}}$  and the imaginary frequency of TS calculated for the formation of 4NP by Nitrobenzene at the M06-2X/6-311++G(3df,3pd) level of theory. All energies are in Hartree and  $T = 298$  K.

| phase        | Steps                      | Molecules                         | $E_{\text{DFT}}$ | $G_{\text{DFT}}$ | $\nu_{\text{im}}$ ( $\text{cm}^{-1}$ ) |
|--------------|----------------------------|-----------------------------------|------------------|------------------|----------------------------------------|
| gas<br>phase | H-<br>abstraction<br>by OH | $\text{RC}_{\text{Nb-OH}}$        | -512.4506363     | -512.375738      |                                        |
|              |                            | $\text{TS}_{\text{Nb-OH}}$        | -512.4374359     | -512.364003      | -1412.9321 <i>i</i>                    |
|              | OH addition                | $\text{IM2}---\text{H}_2\text{O}$ | -512.4617599     | -512.385901      |                                        |
|              |                            | $\text{IM2}+\text{OH}$            | -511.7613890     | -511.710730      |                                        |
|              |                            | 4NP                               | -511.9382659     | -511.862064      |                                        |

**Table S4.** The electronic energy  $E_{\text{DFT}}$ , the Gibbs free energy  $G_{\text{DFT}}$  and the imaginary frequency of TS calculated for the formation of 4M5NC by *p*-Cresol at the M06-2X/6-311++G(3df,3pd) level of theory. All energies are in Hartree and  $T = 298$  K.

| Steps                                       | phase        | Molecules                    | $E_{\text{DFT}}$ | $G_{\text{DFT}}$ | $\nu_{\text{im}}$ ( $\text{cm}^{-1}$ ) |
|---------------------------------------------|--------------|------------------------------|------------------|------------------|----------------------------------------|
| Step 1: H-abstraction<br>by OH              | gas phase    | RC <sub>pC-OH</sub>          | -422.4918755     | -422.383209      |                                        |
|                                             |              | TS <sub>pC-OH</sub>          | -422.4773183     | -422.371344      | -1188.6897 <i>i</i>                    |
|                                             |              | IM3---H <sub>2</sub> O       | -422.5033608     | -422.395347      |                                        |
| Step 2: OH addition                         | gas phase    | IM3+OH                       | -421.7945214     | -421.715393      |                                        |
|                                             |              | IM4                          | -421.9825728     | -421.878094      |                                        |
| Step 3: H-abstraction<br>by OH              | gas phase    | IM4---OH                     | -497.7235822     | -497.612110      |                                        |
|                                             |              | TS <sub>OH</sub>             | -497.7035890     | -497.596750      | -1196.772 <i>i</i>                     |
|                                             |              | IM5---H <sub>2</sub> O       | -497.7267084     | -497.618336      |                                        |
| Step 3: H-abstraction<br>by NO <sub>2</sub> | gas phase    | IM4---NO <sub>2</sub>        | -627.0553941     | -626.950478      |                                        |
|                                             |              | TS <sub>NO<sub>2</sub></sub> | -626.9941024     | -626.892971      | -1555.5559 <i>i</i>                    |
|                                             |              | IM5---HONO                   | -627.0054168     | -626.899673      |                                        |
| Step 3: H-abstraction<br>by NO <sub>2</sub> | liquid phase | IM4---NO <sub>2</sub>        | -627.0642238     | -626.958635      |                                        |
|                                             |              | TS <sub>NO<sub>2</sub></sub> | -627.0043629     | -626.903942      | -1613.0626 <i>i</i>                    |
| Step 4: NO <sub>2</sub> addition            | gas phase    | IM5---HONO                   | -627.0130492     | -626.908874      |                                        |
|                                             |              | IM5+NO <sub>2</sub>          | -626.3608398     | -626.283098      |                                        |
| Step 4: NO <sub>2</sub> addition            | liquid phase | 4M5NC                        | -626.485922      | -626.380532      |                                        |
|                                             |              | IM5+NO <sub>2</sub>          | -626.370609      | -626.293355      |                                        |
|                                             |              | 4M5NC                        | -626.4995951     | -626.394496      |                                        |
